# Supplementary material for: Clinical Efficacy of Infantile Massage in the Treatment of Infant Functional Constipation: A Meta-Analysis
Source: PubMed Central journal article supplement (PMC8232057; doi:10.3389/fpubh.2021.663581), 2021-06-11
Supplement: Data_Sheet_1.pdf [file Data_Sheet_1.pdf]

## Appendix:

**Table 1 Basic characteristics of the included literature**

| Author and publication year               | Sample size | Number of cases (M/F) |       | Age (years) |           | Interventions                                          |                                                                              | Course of treatment (days) | Evaluation indexes |
|-------------------------------------------|-------------|-----------------------|-------|-------------|-----------|--------------------------------------------------------|------------------------------------------------------------------------------|----------------------------|--------------------|
|                                           |             | T                     | C     | T           | C         | T                                                      | C                                                                            |                            |                    |
| Sun Zhengxin <sup>i</sup> , 2012          | 64          | 16/16                 | 14/18 | 2.68±1.90   | 2.64±1.83 | Infant massage                                         | Wangshi Baochi Pills, Oral                                                   | 12                         | ①                  |
| Li Yuting <sup>ii</sup> , 2011            | 76          | 12/26                 | 16/22 | 2.10±1.21   | 1.95±1.14 | Infant massage                                         | Live Combined Bifidobacterium, Lactobacillus and Enterococcus Capsules, Oral | 14                         | ①②④⑤               |
| Chen Meilan <sup>1iii</sup> , 2016        | 60          | 14/16                 | 12/18 | 2.27±1.48   | 2.10±1.44 | Infant massage                                         | Medilac-Vita, Oral                                                           | 14                         | ① ②③④              |
| Huang Ruiyi <sup>iv</sup> , 2016          | 80          | 22/18                 | 21/19 | 1.80±0.24   | 1.98±1.17 | Infant massage                                         | Conventional medication                                                      | 60                         | ①                  |
| Chen Meilan <sup>2v</sup> , 2018          | 120         | 33/27                 | 35/25 | 2.8±1.2     | 2.9±1.5   | Infant massage                                         | Medilac-Vita, Oral                                                           | 14                         | ①②④                |
| Jia Guohua <sup>vi</sup> , 2018           | 72          | 19/17                 | 20/16 | 5.88±1.62   | 5.91±1.59 | Infant massage + Simotang oral liquid and Medilac-Vita | Simotang oral liquid and oral Medilac-Vita                                   | 14                         | ①                  |
| Hao Hongwen <sup>vii</sup> , 2010         | 72          | 19/17                 | 20/16 |             |           | Infant massage                                         | Medilac-Vita, Oral                                                           | 10~20                      | ①                  |
| Xu Fen <sup>c<sup>viii</sup></sup> , 2015 | 122         | 30/31                 | 32/29 | 7.24±2.51   | 7.41±2.46 | infant massage+ oral Chinese medicines                 | Oral Chinese medicines alone                                                 | 14                         | ①                  |
| Xu Fen <sup>ix</sup> , 2011               | 40          | 10/10                 | 9/11  | 5.35±4.17   | 5.58±4.39 | Infant massage                                         | Chinese medicine prescription                                                | 5~10                       | ①                  |
| Shen Hongyan <sup>x</sup> , 2012          | 106         | 32/21                 | 28/25 |             |           | Infant massage + Oral Zengye Decoction                 | TCM Decoction-Oral Zengye Decoction                                          | 20                         | ①                  |
| Wang Yali <sup>xi</sup> , 2018            | 90          | 21/24                 | 23/22 | 3.3±0.8     | 3.1±0.6   | Infant massage                                         | Medilac-Vita, oral                                                           | 10                         | ①                  |

|                                       |     |       |       |            |            |                                                   |                                                                                               |      |    |
|---------------------------------------|-----|-------|-------|------------|------------|---------------------------------------------------|-----------------------------------------------------------------------------------------------|------|----|
| Wang Guoyi <sup>xii</sup> ,<br>2013   | 105 |       |       |            |            | Infant massage + Probiotic treatment              | Live Combined<br>Bifidobacterium,Lactobacillus and<br>Enterococcus Capsules , oral            | 未提及  | ②  |
| Wang Ke <sup>xiii</sup> , 2019        | 120 | 25/35 | 22/38 | 5.53±0.78  | 5.84±0.62  | Infant massage + Baohe Pills                      | Baohe Pills, Oral                                                                             | 7    | ①  |
| Mao Zhilong <sup>xiv</sup> ,<br>2015  | 94  | 25/22 | 24/23 | 7.51±3.16  | 7.43±3.08  | Infant massage + standard care                    | Qidaozhi Tongfu Recipe+standard<br>care                                                       | 14   | ②  |
| Kang Hongyang <sup>xv</sup> , 2014    | 78  | 21/18 | 16/23 | 1.18±1.15  | 1.37±1.62  | Infant massage + standard care                    | Live Combined<br>Bifidobacterium,Lactobacillus and<br>Enterococcus Capsules +standard<br>care | 7~35 | ③  |
| Zhang Yuxia <sup>xvi</sup> ,<br>2019  | 84  | 23/19 | 25/17 | 1.54±0.39  | 1.48±0.37  | Infant massage + Medilac-Vita                     | Medilac-Vita                                                                                  | 14   | ①  |
| Cao Qiaohua <sup>xvii</sup> ,2017     | 70  | 16/19 | 18/17 | 1.40±0.13  | 1.43±0.10  | Infant massage                                    | Siliankang                                                                                    | 14   | ①  |
| Zhu Mei <sup>xviii</sup> ,<br>2012    | 116 | 32/28 | 30/26 |            |            | Infant massage + Siliankang and standard<br>care  | Siliankang and standard care                                                                  | 30   | ①  |
| Li Xiao <sup>xix</sup> , 2018         | 80  | 23/17 | 22/18 | 6.69± 3.74 | 6.58± 3.88 | Infant massage + Medilac-Vita and<br>routine care | Medilac-Vita and routine care                                                                 | 5    | ①  |
| Li Yuxia <sup>xx</sup> , 2018         | 90  | 22/23 | 23/22 | 3.6±0.5    | 3.5±0.7    | Infant massage                                    | Xiaoer Kaiwei Zengshi Mixture, Oral                                                           | 21   | ①⑤ |
| Li Qianghua <sup>xxi</sup> ,<br>2008  | 86  | 24/22 | 22/18 |            |            | Infant massage                                    | Medilac-Vita, Oral                                                                            | 5~10 | ①  |
| Yu Yuehao <sup>xxii</sup> ,<br>2013   | 80  | 21/19 | 18/22 |            |            | Infant massage                                    | Retention enema with kaiselu                                                                  | 3~6  | ①  |
| Liu Liling <sup>xxiii</sup> ,<br>2017 | 100 | 31/19 | 29/21 | 3.02±0.82  | 2.92±0.85  | Infant massage                                    | Medilac-Vita, Oral                                                                            | 10   | ①  |

**Note: Evaluation indicators: ① Efficacy; ② Stool form; ③Defecation frequency; ④ Defecation difficulty; ⑤ Score of constipation symptoms.**

2. Search strategies: Four databases in Chinese and English language were searched, including: Pubmed, CNKI, WanFang and VIP. Since search strategies were the same for Chinese database, only search criteria for the representative Pubmed and CNKI were listed as follows.

The search model was as follows:

1. Pubmed 2021/3/20

#1 search:((((tuina[Title/Abstract]) OR (massage[Title/Abstract])) OR (manipulation [Title/Abstract])) OR (spinal manipulation[Title/Abstract])) OR (chiropractic[Title/Abstract]))

#2 search:(((children[Title/Abstract]) OR (infant[Title/Abstract])) OR ( child[Title/Abstract]))

#3 search: \*constipation[Title/Abstract]

#4 search:"massage" [MeSH Terms]

#5 search:"chiropractic"[MeSH Terms]

#6 search:"spinal"[MeSH Terms]

#7 search:"child"[MeSH Terms]

#8 search:"infant"[MeSH Terms]

#9 search:"constipation"[MeSH Terms]

#10 search: #1 OR #2 OR #3 OR #4 OR #5 OR #6 OR #7 OR #8 OR #9

#11 search: ("2010/01/01"[Date-Publication]:"2020/03/20"[Date-Publication])

2. CNKI 2021/3/20

#1 search:((((([SU=tuina] OR (SU=massage)) OR (SU=manipulation )) OR (SU=spinal manipulation)) OR (SU=chiropractic))

#2 search:(((SU=children)) OR (SU=infant)) OR( SU=child))

#3 search: \*SU=constipation

#4 search: #1 OR #2 OR #3

#5 search: ("2010/01/01"[Date-Publication]:"2020/03/20"[Date-Publication])

3. Sensitivity analysis

3.1 Stool form score

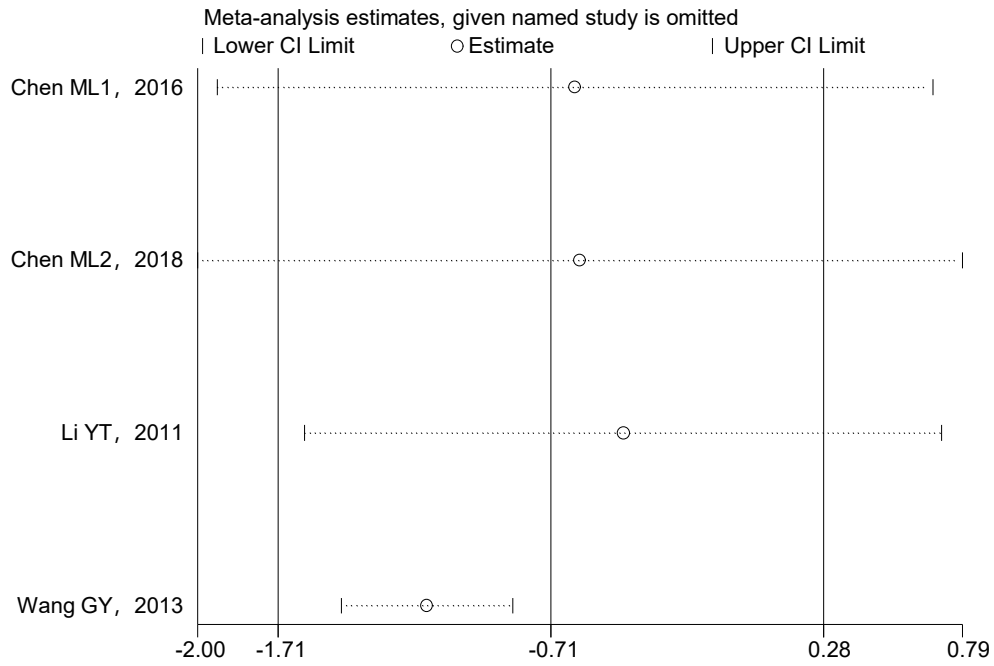

### 3.2 Defecation frequency

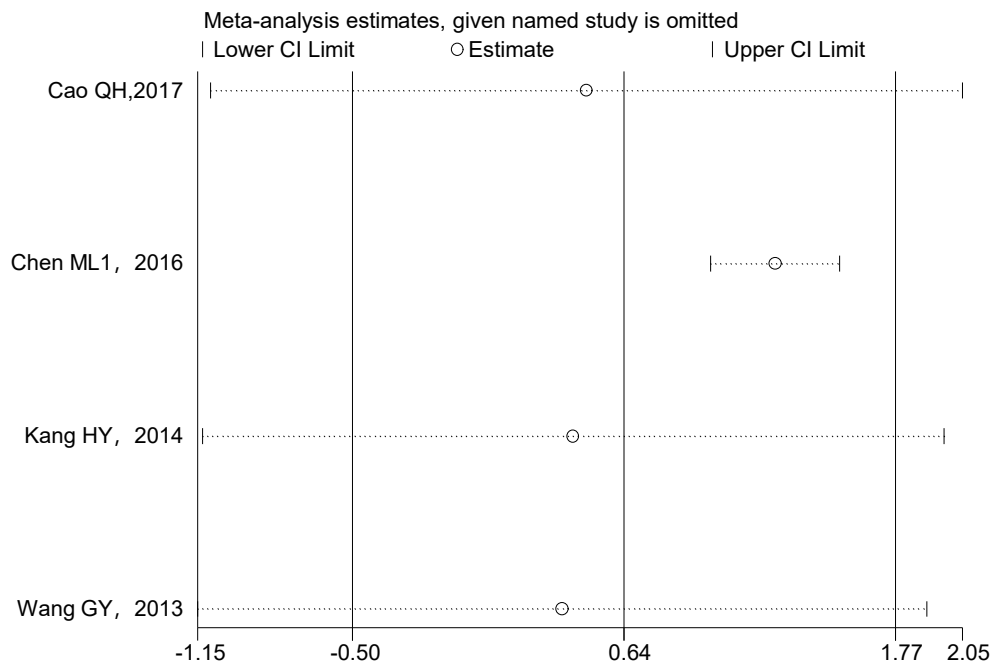

### 3.3 Constipation symptom score

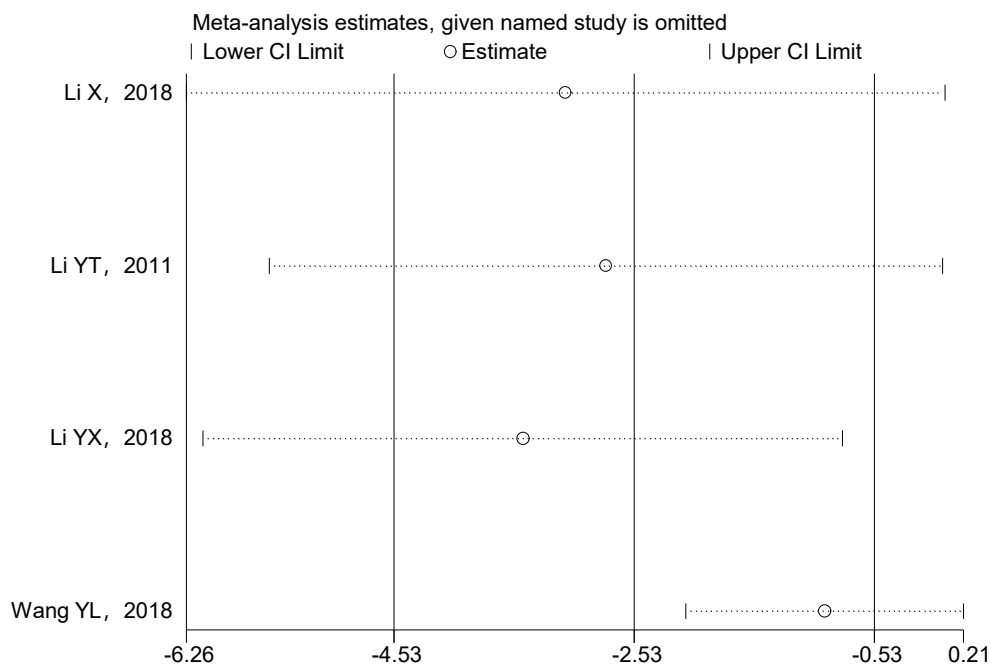

## Conflict of Interest

The authors declare that they have no competing interests, and due care has been taken to ensure the integrity of the work. Neither the entire paper nor any part of its content has been published or has been accepted elsewhere. It is not being submitted to any other journal. The authors have no other relevant affiliations or financial involvement with any organization or entity with a financial interest in or financial conflict with the subject matter or materials discussed in the manuscript apart from those disclosed.

## Author Contributions

All authors have made substantive contributions to this study in regard to design and implementation. Z.L.,G.L. took part in the design of the study,performed the literature survey and drafted the manuscript. YW.M. took part Data Management implementation of the study. Z.L. was responsible for statistical analysis. Z.L. was responsible for the methodological design of study.L.L.&. Z.L. is the corresponding authors for the article. All the authors read and approved the final manuscript.

## Acknowledgments

We gratefully acknowledged the cooperation of all research staff and participants. The funding was supported by the National Natural Science Foundation of China (No.81503456), and the Tianjin enterprise science and technology commissioner project (No.18JCTPJC65500).

---
